# Supplementary material
Source: publisher figshare collection journal article supplement (https://acs.figshare.com/ndownloader/files/5832108)
Supplement: Supplementary file 1 [file 5832108]

# Use of the *vicinal* Element Effect for Regiochemical Control of Quinone Substitutions and its Implication for Convergent Mitomycin Construction

Amie L. Cox and Jeffrey N. Johnston\*

Department of Chemistry, Indiana University, Bloomington, IN 47405-7102

## Supporting Information

Flame-dried (under vacuum) glassware was used for all non-aqueous reactions. All reagents and solvents were commercial grade and purified prior to use when necessary. Diethyl ether (Et<sub>2</sub>O), tetrahydrofuran (THF), dichloromethane (CH<sub>2</sub>Cl<sub>2</sub>), and benzene (C<sub>6</sub>H<sub>6</sub>) were dried by passage through a column of activated alumina as described by Grubbs.<sup>1</sup> Benzene was additionally passed through a column containing activated Q-5 reactant. Solvents other than benzene were degassed using the freeze-pump-thaw method when necessary. All additional solvents were dried by distillation from calcium hydride when necessary. Molecular sieves (spheres, 4Å) were calcined at 400 °C and stored at room temperature in an air-tight container. 2,3-Dibromo-5-methoxy-6-methylbenzoquinone was prepared according to the procedure described by Rapoport.<sup>1</sup> The preparation of stannyleneamine **4** will be described later.

Thin layer chromatography (TLC) was performed using glass-backed silica gel (250 μ) plates and flash chromatography utilized 230–400 mesh silica gel from Scientific Adsorbents. Neutral Alumina was used as received from Scientific Adsorbents for chromatography of acid-sensitive intermediates or products. Products were visualized by UV light, iodine, and/or the use of ceric ammonium molybdate, potassium permanganate, ninhydrin, *p*-anisaldehyde, and potassium iodoplatinate solutions.

IR spectra were recorded on a Nicolet Avatar 360 spectrophotometer. Liquids and oils were analyzed as neat films on a salt plate (transmission), whereas solids were applied to a diamond plate (ATR). Nuclear magnetic resonance spectra (NMR) were acquired on either a Varian Inova-400 or VXR-400 instrument. Chemical shifts are measured relative to tetramethylsilane, as judged

---

<sup>1</sup> Luly, J. R.; Rapoport, H. J. Am. Chem. Soc. 1983, 105, 2859-2866.

by the residual partially deuterated solvent peak. Mass spectra were obtained using a Kratos MS-80 spectrometer using the ionization technique indicated. Combustion analyses were performed by Atlantic Microlabs, Norcross, GA.

Ratios of diastereomers and isomeric products were measured directly from integration of  $^1\text{H}$  NMR absorptions of protons common to the components. Precision was checked by varying the relaxation delay for measurements on the same compound. Ratios reported generally represent a lower limit defined by multiple runs.

Calculations were performed on minimized structures using PC Model (Serena Software) and the MOPAC suite (both PM3 and AM1).

## General Procedure for Methanol Additions

A methanol solution of quinone **1** (0.01 M) at rt was treated with sodium methoxide in a single portion. The reaction was followed by TLC to completion and the solvent was removed under reduced pressure. The crude mixture was dissolved in EtOAc, washed with water, and dried ( $\text{Na}_2\text{SO}_4$ ) prior to chromatographic purification.

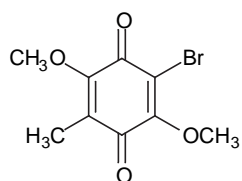

**2-Bromo-3,6-dimethoxy-4-methyl *p*-benzoquinone (6).** A small amount of the corresponding hydroquinones, produced in the same ratio as the quinones, was typically observed. Therefore, the crude mixture was treated with 10% Pd/C in ethyl acetate and stirred open to the air for 2 h. The mixture was filtered through Celite and silica gel, washing well with EtOAc. Purification over silica gel (1-3% ether in hexanes) gave an orange solid, mp 107-108.5 °C;  $R_f=0.12$  (2%  $\text{Et}_2\text{O}$ /hexanes -  $\text{SiO}_2$ ); IR (ATR) 1666, 1653, 1590  $\text{cm}^{-1}$ ;  $^1\text{H}$  NMR (400 MHz,  $\text{CDCl}_3$ )  $\delta$  4.19 (s, 3H), 4.04 (s, 3H), 1.93 (s, 3H);  $^{13}\text{C}$  NMR (100 MHz,  $\text{CDCl}_3$ ) ppm 182.0, 176.8, 156.9, 155.3, 126.4, 115.1, 61.9, 61.4, 8.8; HRMS (CI): Exact mass calcd for  $\text{C}_9\text{H}_9\text{BrO}_4$   $[\text{M}]^+$ , 259.9684. Found 259.9696.

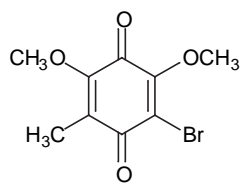

**2-Bromo-3,5-dimethoxy-6-methyl *p*-benzoquinone (7).**

Purification over silica gel (1-3% ether in hexanes) or recrystallization from ether gave an orange solid, mp 136.5-138 °C.  $R_f=0.09$  (2%  $\text{Et}_2\text{O}$ /hexanes -  $\text{SiO}_2$ ); IR (ATR) 1665, 1651, 1640  $\text{cm}^{-1}$ ;  $^1\text{H}$  NMR (400 MHz,  $\text{CDCl}_3$ )  $\delta$  4.14 (s, 3H), 3.97 (s, 3H), 1.99 (s, 3H);  $^{13}\text{C}$  NMR (100 MHz,  $\text{CDCl}_3$ ) ppm 180.9, 177.1, 155.7, 154.4, 129.1, 118.9, 61.6, 61.1, 9.9; HRMS (CI): Exact mass calcd for  $\text{C}_9\text{H}_9\text{BrO}_4$   $[\text{M}]^+$ , 259.9684. Found 259.9673.

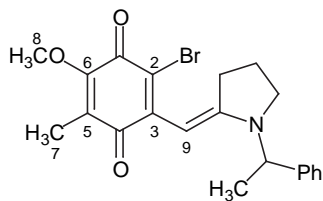

**Quinone adduct 5.** A cold (0 °C) THF solution of quinone **6** was treated with a THF solution of enamine **4**, resulting in an immediate color change from orange to blue. Following a period of stirring (30 min), the solvent was removed and replaced with Et<sub>2</sub>O/aq KF solution.

After a white solid had formed, the layers were separated, the aqueous layer was further extracted with ether, and the combined organic layers were dried (Na<sub>2</sub>SO<sub>4</sub>). Filtration, concentration in vacuo, and chromatography using a jacketed column cooled with ice-water (alumina, 0-5-10% ethyl acetate in hexanes) furnished the unstable quinone (40% yield) as a blue oil. *R*<sub>f</sub>=0.22 (20% EtOAc/hexanes - SiO<sub>2</sub>); IR (film) 1653, 1648, 1540 cm<sup>-1</sup>; <sup>1</sup>H NMR (400 MHz, CDCl<sub>3</sub>) δ 7.39-7.26 (m, 5H), 5.46 (s, 1H), 5.14 (q, *J* = 7.0 Hz, 1H), 4.02 (s, 3H), 3.51-3.44 (m, 1H), 3.31-3.25 (m, 1H), 2.91-2.83 (m, 1H), 2.74-2.67 (m, 1H), 1.99-1.81 (m, 2H), 1.92 (s, 3H), 1.65 (d, *J*=7.0 Hz, 3H); <sup>13</sup>C NMR (100 MHz, CDCl<sub>3</sub>) ppm 187.1, 174.4, 163.5, 156.5, 147.8, 140.2, 129.1, 129.1, 128.0, 126.7, 126.7, 126.7, 116.3, 92.0, 61.3, 54.3, 48.6, 34.8, 22.5, 17.8, 9.4; HRMS (EI): Exact mass calcd for C<sub>21</sub>H<sub>22</sub>BrNO<sub>3</sub> [M]<sup>+</sup>, 415.0783. Found 415.0790.

**5** Could also be generated in 21% yield by addition of **4** to **1** in cold (-78 °C) THF, followed by work-up as described above.

*Structural assignment.* (400 MHz, Varian I400) An HMBC experiment (Figure S1) revealed <sup>3</sup>*J*<sub>HC</sub> crosspeaks for H7→C1, H9→C1, and H9→C2, consistent with the regiochemistry depicted. NOE measurements revealed an enhancement (22%) of CH<sub>3</sub>CHN(Ph) upon irradiation of H9.

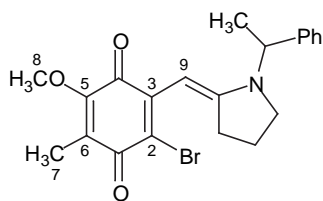

**Quinone adduct 10.** In a manner analogous to the synthesis of **5**, the unstable blue quinone **10** was prepared from **7** in 38% isolated yield after chromatography using a jacketed column cooled with ice-water (alumina, 0-10-30% Et<sub>2</sub>O/hexanes). *R*<sub>f</sub>=0.07 (20%

EtOAc/hexanes - SiO<sub>2</sub>); IR (film) 1663, 1636, 1560 cm<sup>-1</sup>; <sup>1</sup>H NMR (400 MHz, CDCl<sub>3</sub>) δ 7.40-7.27 (m, 5H), 5.39 (s, 1H), 5.11 (q, *J*=7.0 Hz, 1H), 3.91 (s, 3H), 3.51-3.45 (m, 1H), 3.32-

3.27 (m, 1H), 2.88-2.80 (m, 1H), 2.68-2.62 (m, 1H), 1.99 (s, 3H), 1.97-1.83 (m, 2H), 1.66 (d,  $J=7.0$  Hz, 3H);  $^{13}\text{C}$  NMR (100 MHz,  $\text{CDCl}_3$ ) ppm 181.7, 179.4, 161.4, 155.5, 146.0, 140.4, 129.0, 128.9, 128.9, 127.8, 126.6, 126.6, 118.9, 90.3, 60.2, 54.1, 48.2, 34.5, 22.4, 17.7, 9.9.

*Structural assignment.* (400 MHz, Varian I400) An HMBC experiment (Figure S2) revealed  $^3J_{\text{HC}}$  crosspeaks for  $\text{H7} \rightarrow \text{C1}$ ,  $\text{H9} \rightarrow \text{C4}$ , and  $\text{H9} \rightarrow \text{C2}$ , consistent with the regiochemistry depicted. NOE measurements revealed an enhancement (25%) of  $\text{CH}_3\text{CHN}(\text{Ph})$  upon irradiation of H9.

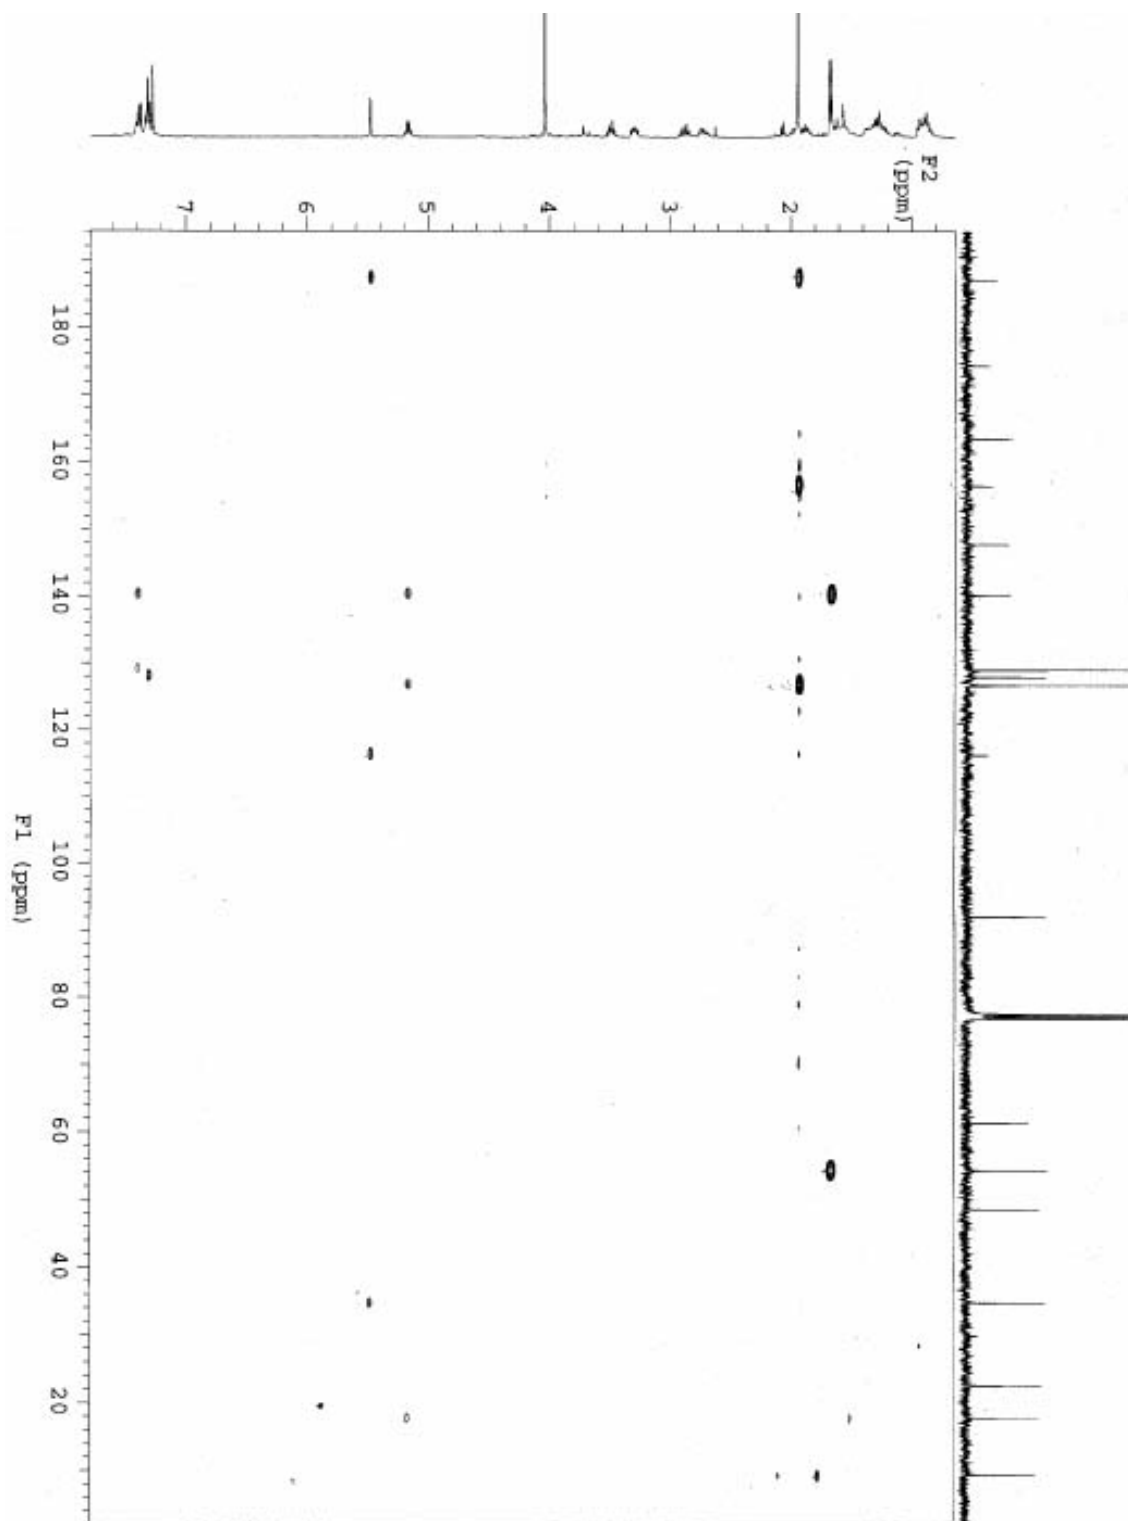

Figure S1. HMBC Plot (400 MHz) of quinone adduct **5**.

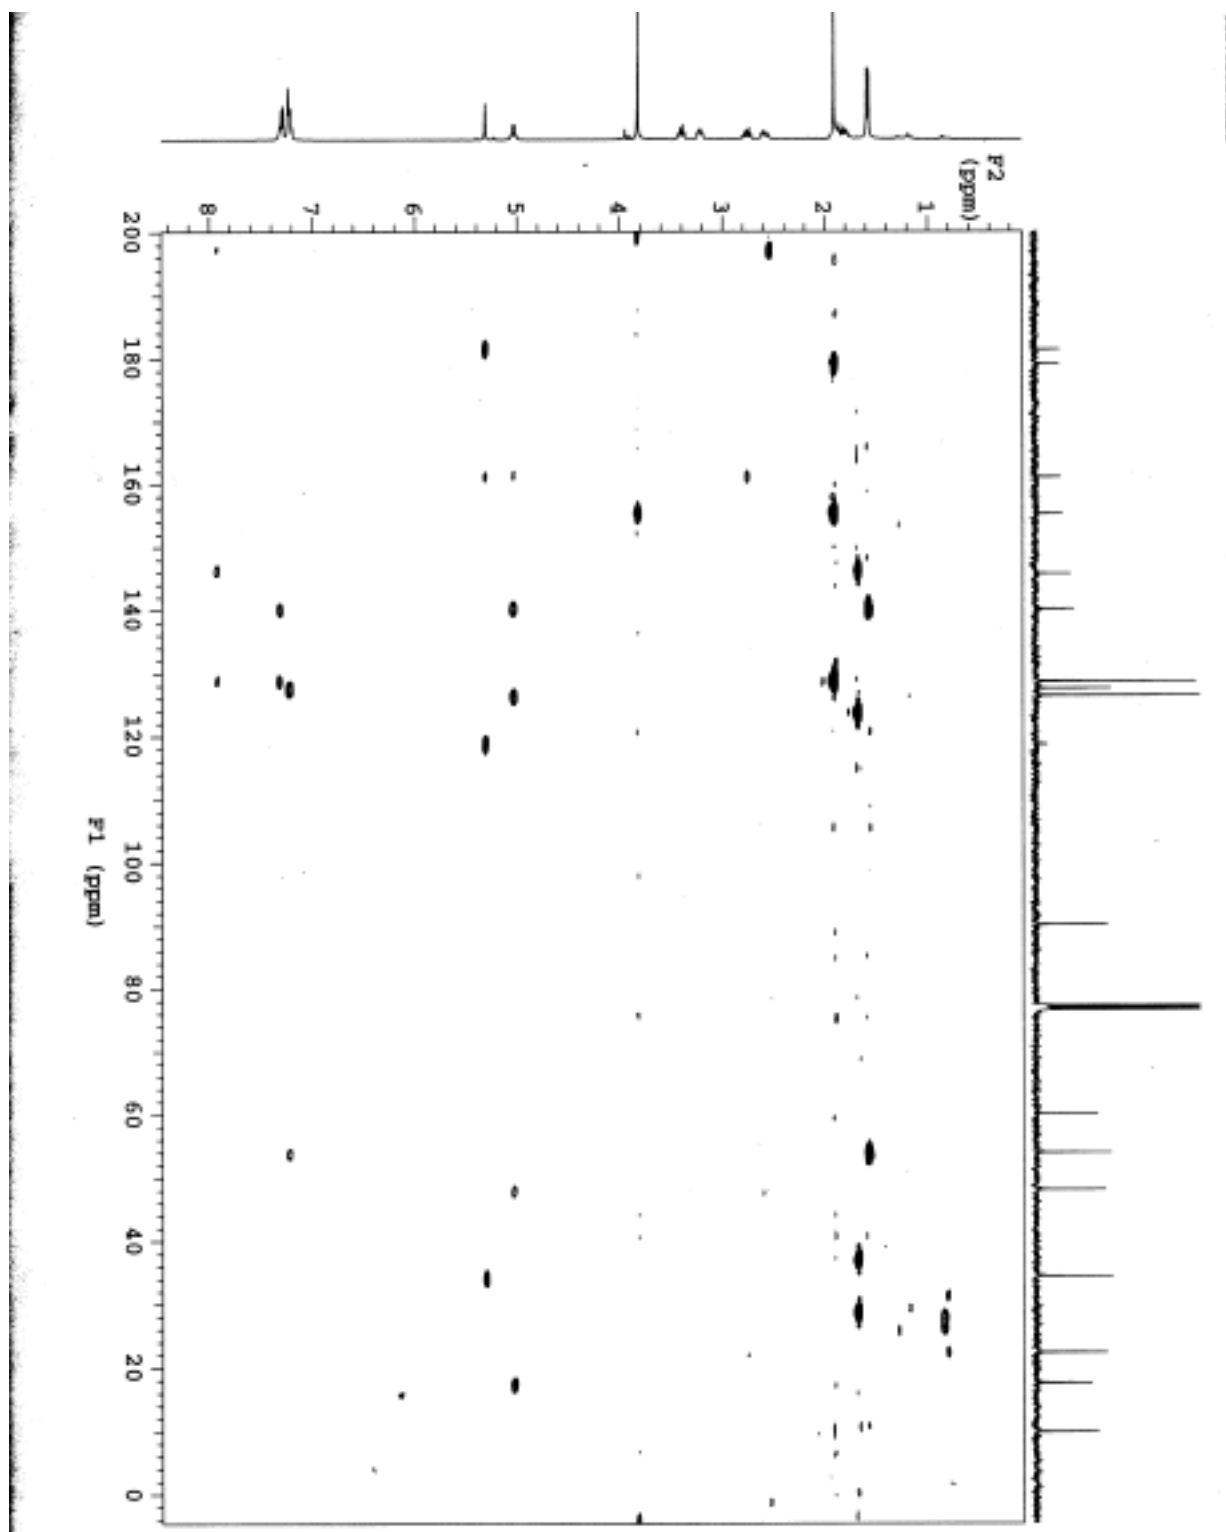

Figure S2. HMBC Plot (400 MHz) of quinone adduct **10**.

<sup>1</sup> Pangborn, A.B.; Giardello, M.A.; Grubbs, R.H.; Rosen, R.K.; Timmers, F.J. *Organometallics* **1996**, *15*, 1518–1520.
